# Supplementary material for: A Drosophila model for fetal alcohol syndrome disorders: role for the insulin pathway
Source: PubMed Central journal article supplement — Dis Model Mech. 2011 Feb 8;4(3):335–46. doi: 10.1242/dmm.006411 (PMC3097455; doi:10.1242/dmm.006411), 2011-02-08
Supplement: supp_006411_DMM006411FigS1.pdf [file supp_006411_DMM006411FigS1.pdf]

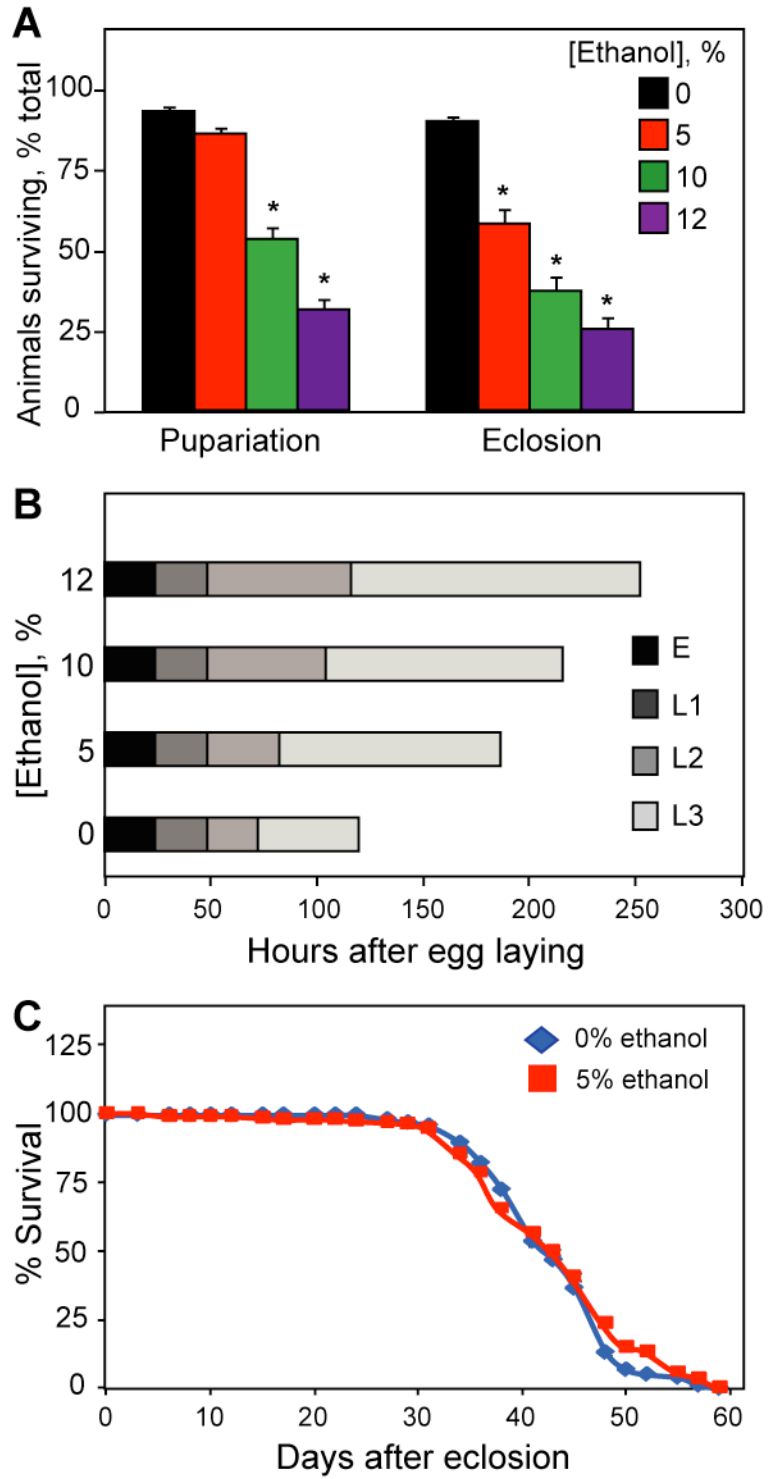

Figure S1

**Figure S1: Effects of ethanol on lethality, developmental delay and lifespan**

**A.** Developmental ethanol exposure causes fewer animals surviving to pupariation and eclosion (Dunnett's,  $N=6$ ,  $*p<0.001$ ). **B.** Total duration of larval development is prolonged by ethanol-rearing conditions. Developmental stages of an equal number of control and ethanol-reared larvae were determined by morphology of mouth hooks and anterior spiracles. Different colored bars indicate when 50% of the animals have transitioned to the next stage. Larvae were staged 24 hours after egg laying (AED). The duration of metamorphosis was not modified by ethanol-rearing conditions (data not shown). **C.** Lifespan was not significantly altered by developmental ethanol exposure ( $N=7$ ).
