# Supplementary material for: A Drosophila model for fetal alcohol syndrome disorders: role for the insulin pathway
Source: PubMed Central journal article supplement — Dis Model Mech. 2011 Feb 8;4(3):335–46. doi: 10.1242/dmm.006411 (PMC3097455; doi:10.1242/dmm.006411), 2011-02-08
Supplement: supp_006411_DMM006411FigS2.pdf [file supp_006411_DMM006411FigS2.pdf]

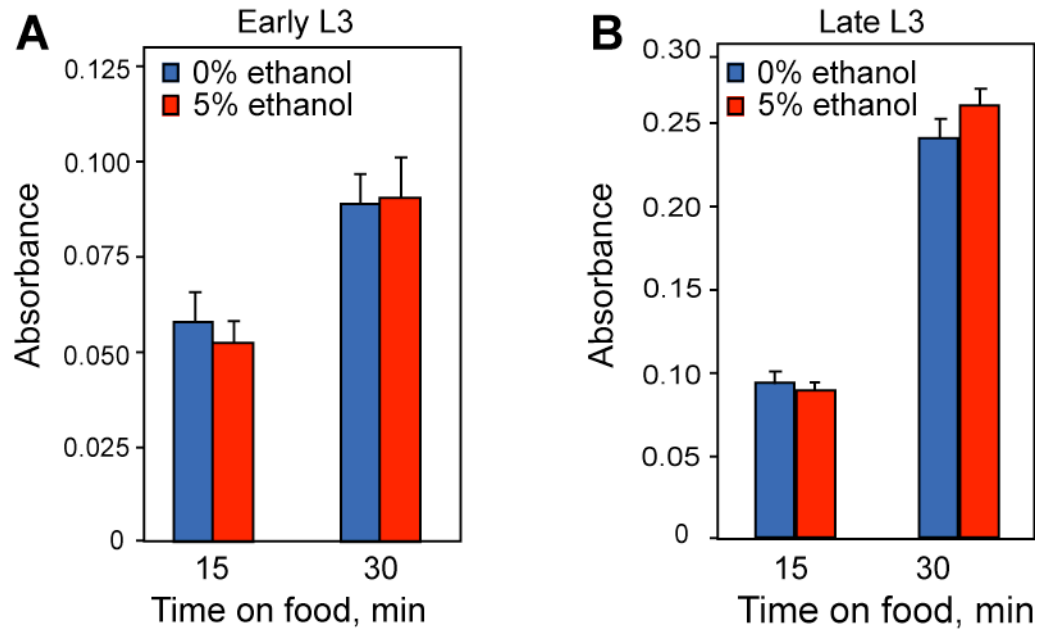

Figure S2

**Figure S2: Larval feeding is not altered by ethanol in the food.** (A) Early third instar and (B) late third instar larvae reared on regular or ethanol-containing food were fed a 0 or 5% ethanol food-dye mixture for 15 and 30 minutes. The presence of ethanol in the food does not alter consumption (N=6).
