# Supplementary material for: A Drosophila model for fetal alcohol syndrome disorders: role for the insulin pathway
Source: PubMed Central journal article supplement — Dis Model Mech. 2011 Feb 8;4(3):335–46. doi: 10.1242/dmm.006411 (PMC3097455; doi:10.1242/dmm.006411), 2011-02-08
Supplement: supp_006411_DMM006411FigS3.pdf [file supp_006411_DMM006411FigS3.pdf]

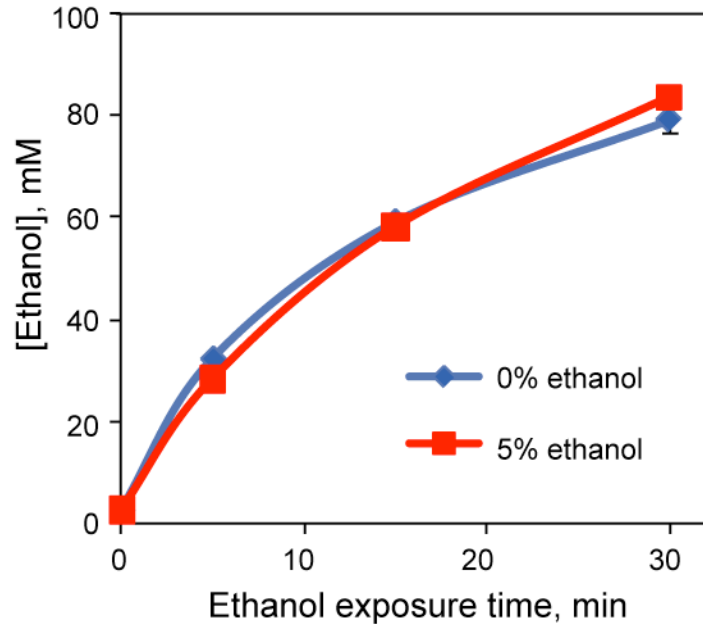

Figure S3

**Figure S3: Ethanol-reared adult flies absorb ethanol normally.** A. Ethanol absorption was measured in extracts from 0 and 5% ethanol-reared adult flies after vaporized ethanol exposures of 0, 5, 15 and 30 minutes (110:40, vaporized ethanol:humidified air). No significant differences in ethanol absorption were detected between control and ethanol-reared animals (N=6).
