# Supplementary material for: A Drosophila model for fetal alcohol syndrome disorders: role for the insulin pathway
Source: PubMed Central journal article supplement — Dis Model Mech. 2011 Feb 8;4(3):335–46. doi: 10.1242/dmm.006411 (PMC3097455; doi:10.1242/dmm.006411), 2011-02-08
Supplement: supp_006411_DMM006411FigS4.pdf [file supp_006411_DMM006411FigS4.pdf]

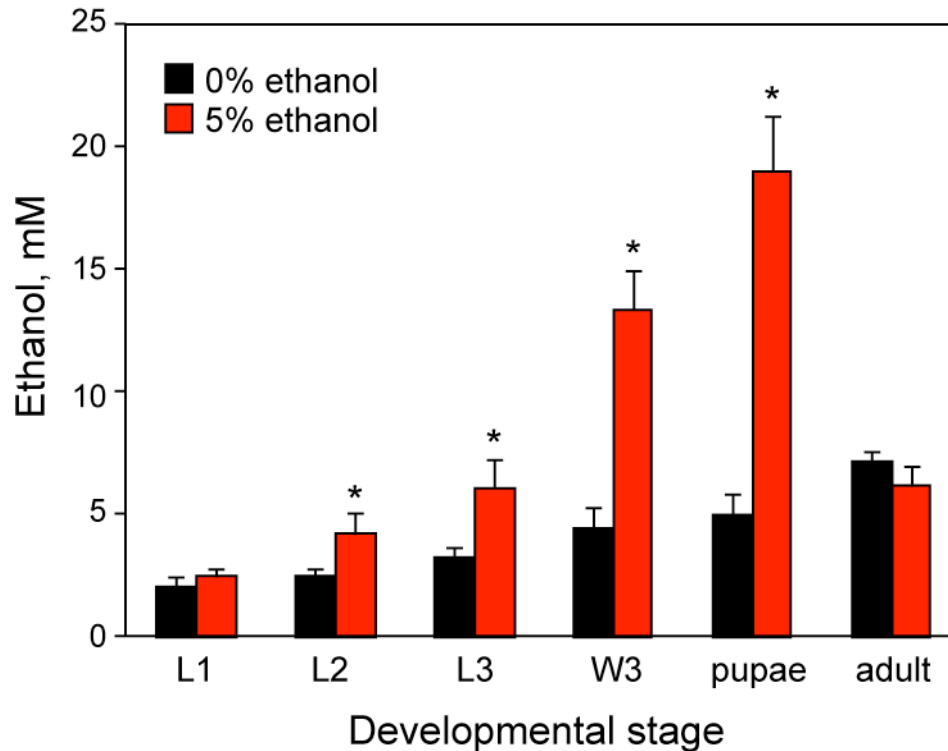

Figure S4

**Figure S4: Internal ethanol concentration increases during developmental ethanol exposure.**

The concentration of ethanol was measured in extracts from 0% and 5% ethanol-reared larvae at discrete developmental stages. The concentration of ethanol is highest during larval development and metamorphosis; both stages are sensitive to ethanol toxicity (Student's t-test,  $N=3$ ,  $*p<0.01$ ). The measurements for internal ethanol concentration were adjusted to the volume of the animals at the various developmental stages (Table S1). E, embryos; L1, first larval instar; L2, second larval instar; L3, third larval instar; W3, wandering larvae; M, metamorphosis; A, adults.
