# Supplementary material for: A Drosophila model for fetal alcohol syndrome disorders: role for the insulin pathway
Source: PubMed Central journal article supplement — Dis Model Mech. 2011 Feb 8;4(3):335–46. doi: 10.1242/dmm.006411 (PMC3097455; doi:10.1242/dmm.006411), 2011-02-08
Supplement: supp_006411_DMM006411FigS5.pdf [file supp_006411_DMM006411FigS5.pdf]

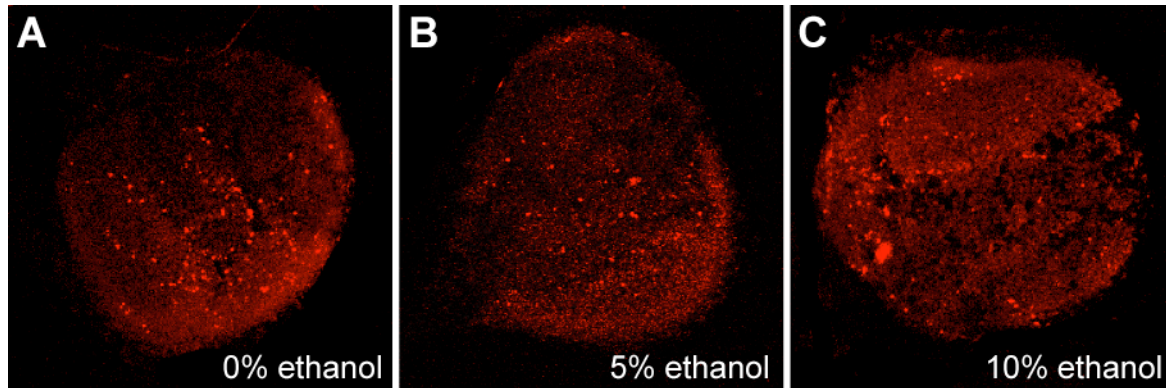

Figure S5

**Figure S5. Developmental ethanol exposure does not increase apoptosis in the larval brain.**

**A-C.** Cells undergoing apoptosis, in the larval brain, were labeled by Terminal deoxynucleotidyl transferase dUTP nick end labeling (*TUNEL*). Representative samples of larval brains dissected from larvae reared on **(A)** 0% ethanol, **(B)** 5%-ethanol and **(C)** 10% ethanol (60X magnification). The number of cells undergoing apoptosis in the larval CNS was not significantly altered by developmental ethanol exposure.
