# Supplementary material for: A Drosophila model for fetal alcohol syndrome disorders: role for the insulin pathway
Source: PubMed Central journal article supplement — Dis Model Mech. 2011 Feb 8;4(3):335–46. doi: 10.1242/dmm.006411 (PMC3097455; doi:10.1242/dmm.006411), 2011-02-08
Supplement: supp_006411_DMM006411FigS6.pdf [file supp_006411_DMM006411FigS6.pdf]

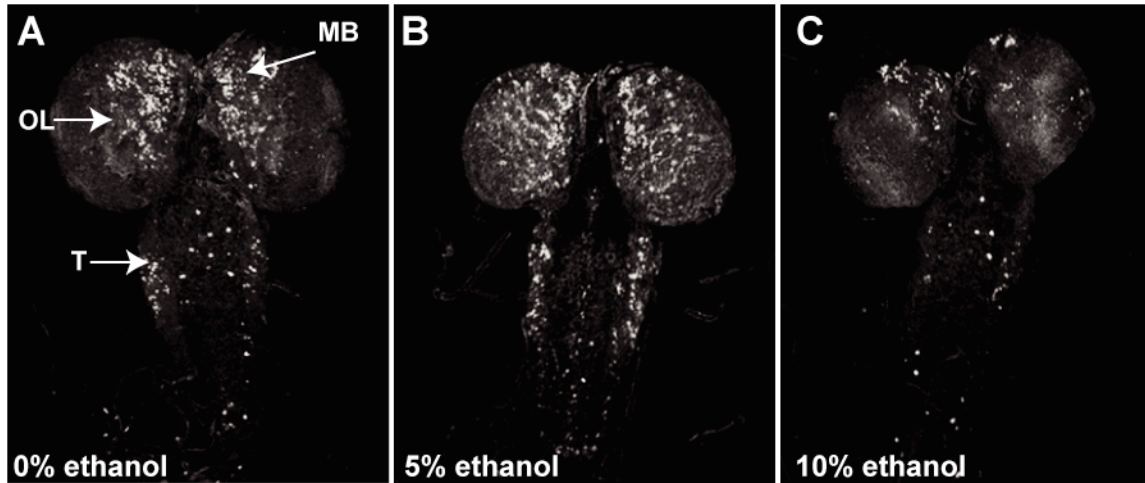

Figure S6

**Figure S6: Defective proliferation in the larval CNS persists in 10% ethanol-reared larvae**  
Replicating cells (S-phase) in the central nervous system of control and ethanol-reared larvae was assessed by pulse labeling with BrdU at 68-72h post-hatching with dissection at the wandering third instar stage. Representative samples of larval brains dissected from larvae reared on (A) 0% ethanol, (B) 5% ethanol and (C) 10% ethanol (40X magnification). Arrows indicate labeling in the mushroom body (MB), optic lobe (OL) and thoracic (T) neurons. Reduced proliferation persists in 10% ethanol-reared larvae compared to 0 and 5% ethanol-reared larvae.
