# Supplementary material for: A Drosophila model for fetal alcohol syndrome disorders: role for the insulin pathway
Source: PubMed Central journal article supplement — Dis Model Mech. 2011 Feb 8;4(3):335–46. doi: 10.1242/dmm.006411 (PMC3097455; doi:10.1242/dmm.006411), 2011-02-08
Supplement: supp_006411_DMM006411FigS7.pdf [file supp_006411_DMM006411FigS7.pdf]

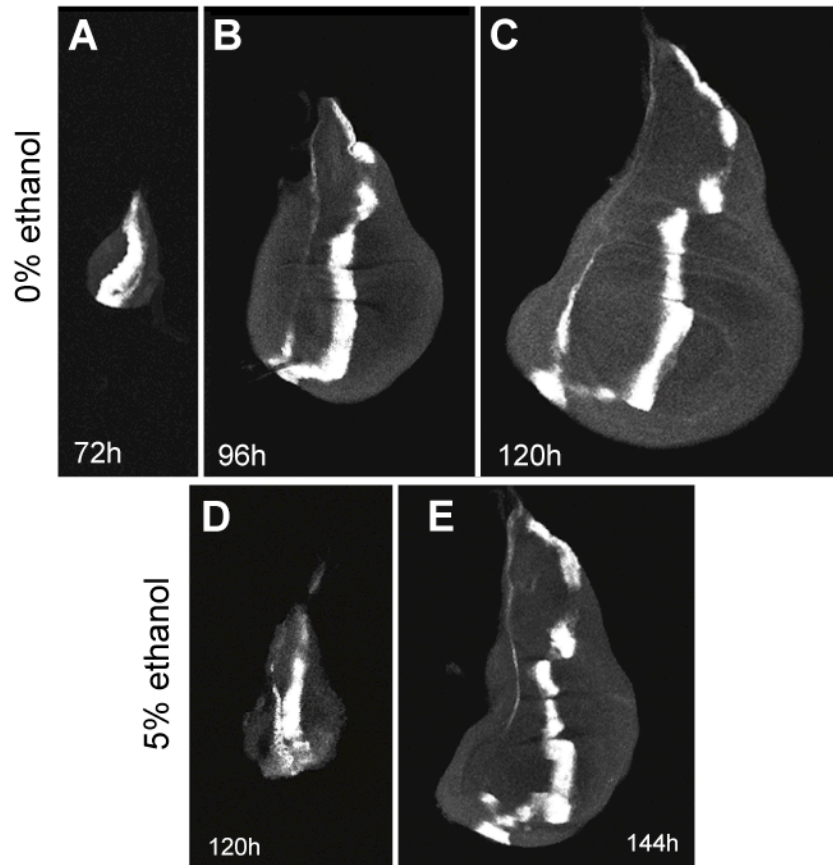

Figure S7

**Figure S7: Imaginal disc growth is delayed by developmental ethanol exposure.** Wing imaginal discs showing *decapentaplegic* (*dpp-lacZ*) expression from control larvae staged at (A) 72h after egg deposition (AED), (B) 96h AED and (C) 120h AED. Wing imaginal discs with *dpp-lacZ* expression from 5% ethanol-reared larvae staged at (D) 120h AED and (E) 144h AED. Wing imaginal discs from control and ethanol-reared larvae were dissected the earliest developmental stage possible, at 72h AED and 120h AED, respectively.
