# Supplementary material for: A Drosophila model for fetal alcohol syndrome disorders: role for the insulin pathway
Source: PubMed Central journal article supplement — Dis Model Mech. 2011 Feb 8;4(3):335–46. doi: 10.1242/dmm.006411 (PMC3097455; doi:10.1242/dmm.006411), 2011-02-08
Supplement: supp_006411_DMM006411FigS8.pdf [file supp_006411_DMM006411FigS8.pdf]

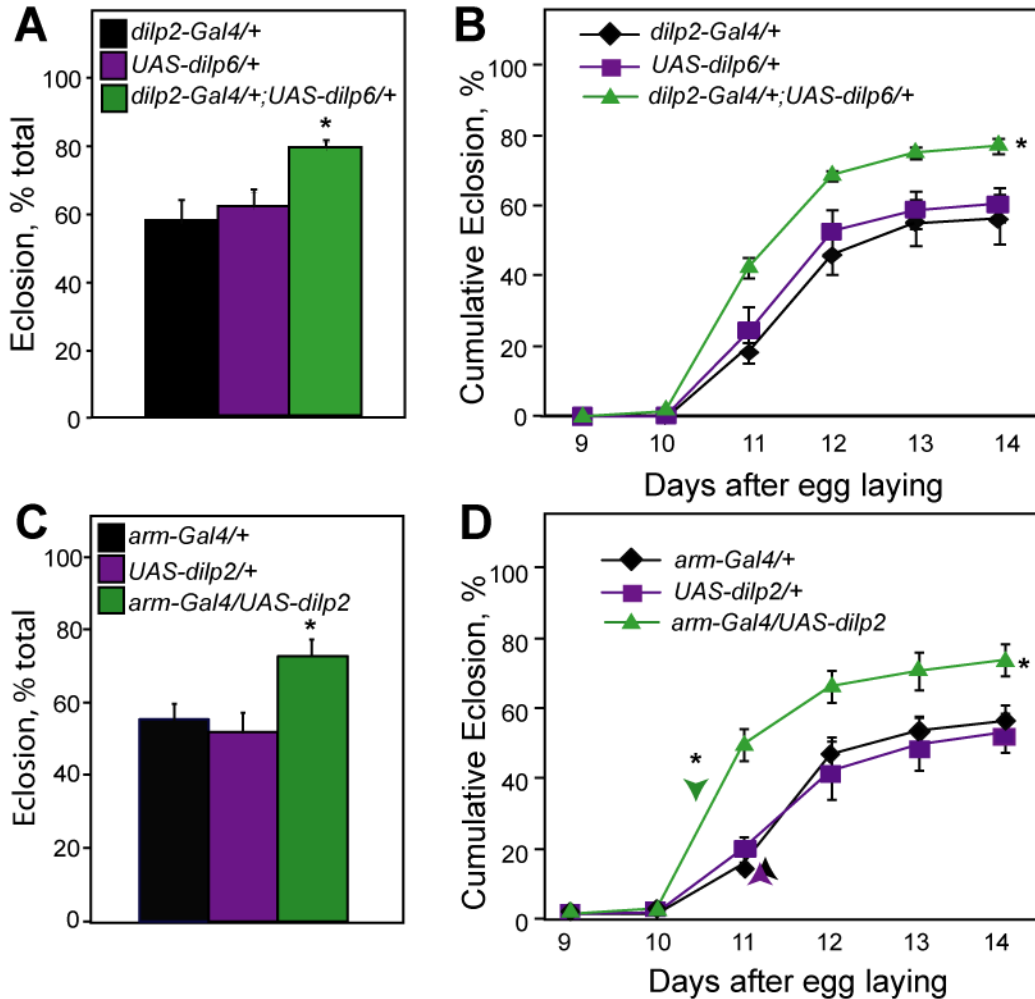

Figure S8

**Figure S8. Larval expression of *dilp6* and *dilp2* mitigates ethanol-induced lethality and developmental delay.**

**A, B.** Larval expression of *dilp6* in the insulin-producing cells (IPCs) of the central nervous system, using *dilp2-GAL4*, ameliorates the lethality induced by developmental ethanol exposure. **(A)** Total eclosion (mean  $\pm$  SEM) and **(B)** cumulative eclosion rates of *dilp6* over-expressing larvae (*dilp2-GAL4/+;UAS-dilp6/+*) differs from control larvae (*dilp2-GAL4/+* and *UAS-dilp6/+*) (**A**: one way ANOVA with Tukey HSD post-hoc analysis, N=6, \*p=0.0203; **B**: Repeated Measures ANOVA, N=6, within and between groups \*p<0.009). **C, D.** Larval expression of *dilp2* throughout the animal, using *armadillo-GAL4*, suppresses the developmental delay and

lethality induced by developmental ethanol exposure. **C.** Total eclosion (mean  $\pm$  SEM) of *dilp2* over-expressing larvae (*arm-GAL4/UAS-dilp2*) differs from control larvae (*arm-GAL4/+* and *UAS-dilp2/+*) (one-way ANOVA with Tukey HSD post-hoc analysis, N=6, p=0.0328). **D.** Cumulative eclosion rates and time to 50% total eclosion (indicated by arrowheads) of *dilp2* over-expressing larvae differs from control larvae (**C:** one-way ANOVA, with Tukey HSD post-doc analysis N=6, p=0.0009; **D:** Repeated Measures ANOVA, N=6, between and within groups \*p<0.0001).
