# Supplementary material for: A Drosophila model for fetal alcohol syndrome disorders: role for the insulin pathway
Source: PubMed Central journal article supplement — Dis Model Mech. 2011 Feb 8;4(3):335–46. doi: 10.1242/dmm.006411 (PMC3097455; doi:10.1242/dmm.006411), 2011-02-08
Supplement: supp_006411_DMM006411FigS9.pdf [file supp_006411_DMM006411FigS9.pdf]

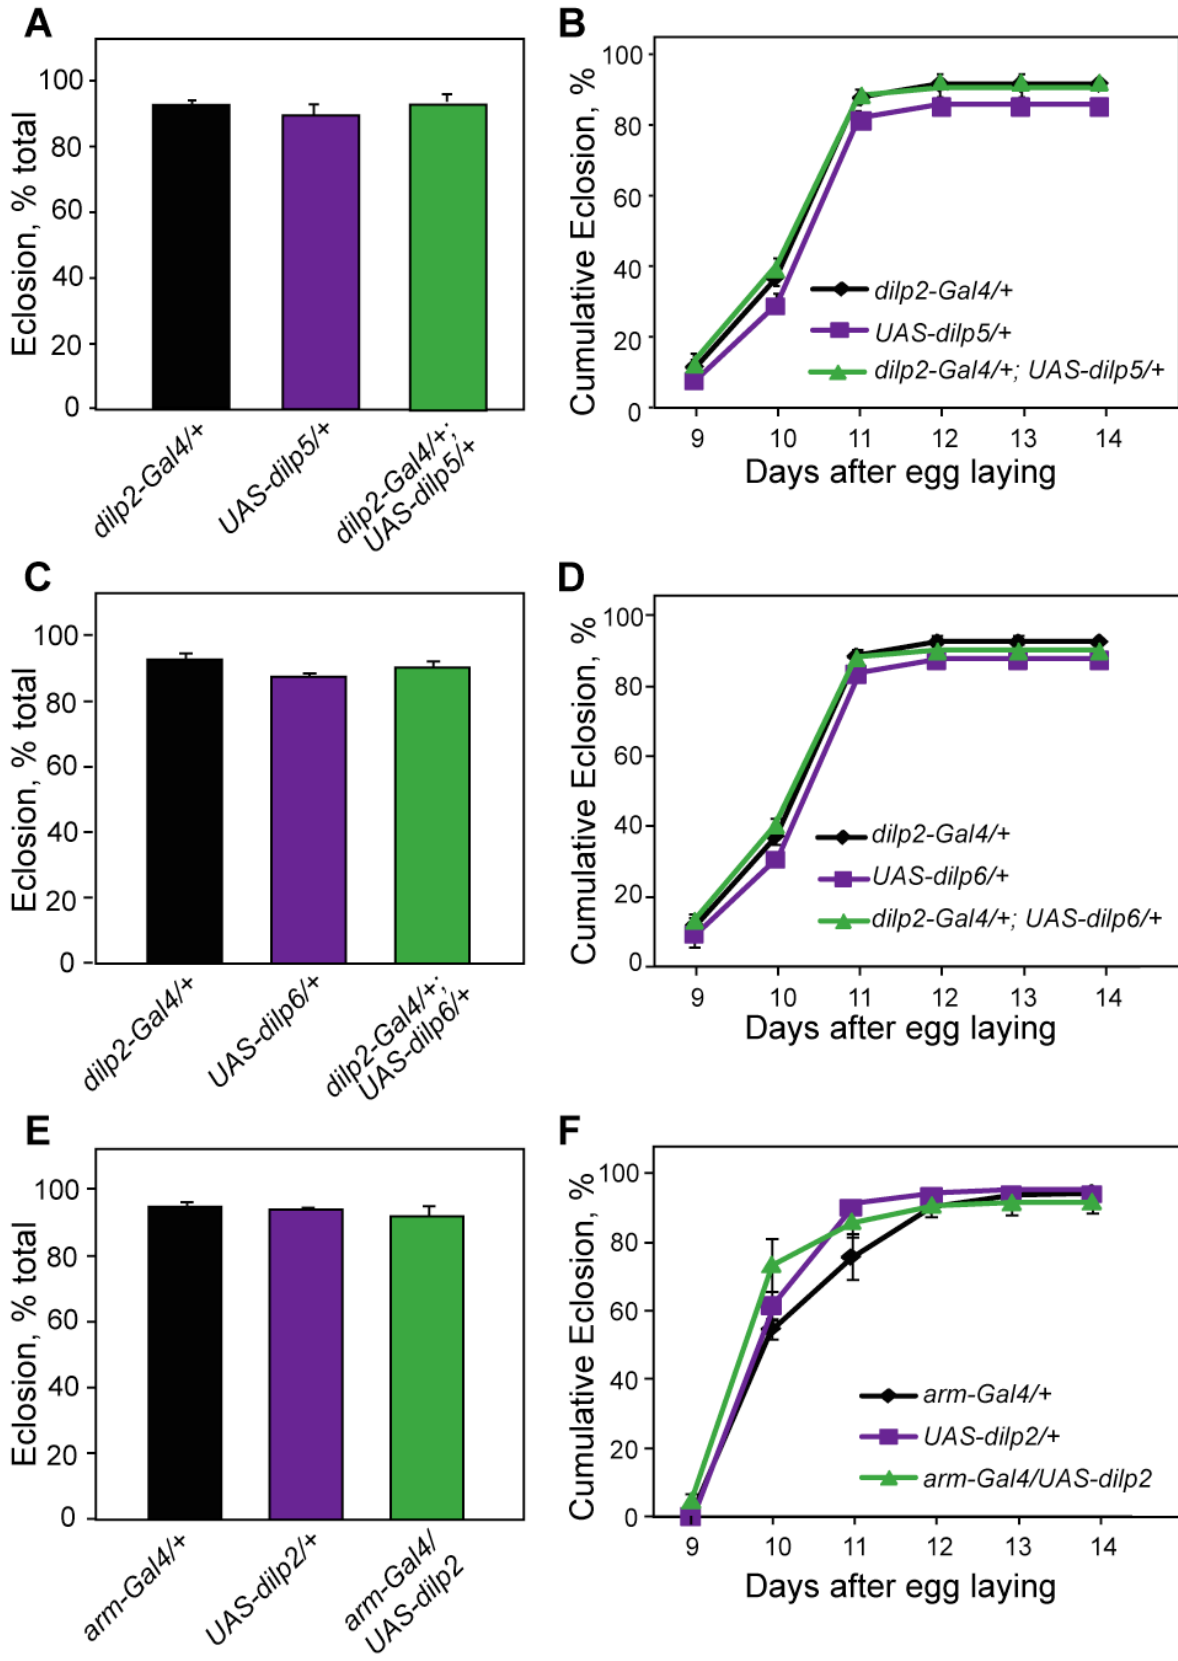

Figure S9

**Figure S9: *dilp* overexpression does not alter adult viability/developmental time**

**A-C.** *dilp* over-expressing larvae reared on regular media (0% ethanol food) show no difference in developmental time to eclosion and adult viability. **A, B.** *dilp5* and *dilp6* were expressed in the insulin producing cells (IPCs) of the central nervous system, using *dilp2-GAL4*, while **(C)** *dilp2* was expressed throughout the animal using *armadillo-GAL4*.
