# Supplementary material for: A Drosophila model for fetal alcohol syndrome disorders: role for the insulin pathway
Source: PubMed Central journal article supplement — Dis Model Mech. 2011 Feb 8;4(3):335–46. doi: 10.1242/dmm.006411 (PMC3097455; doi:10.1242/dmm.006411), 2011-02-08
Supplement: supp_006411_DMM006411FigS10.pdf [file supp_006411_DMM006411FigS10.pdf]

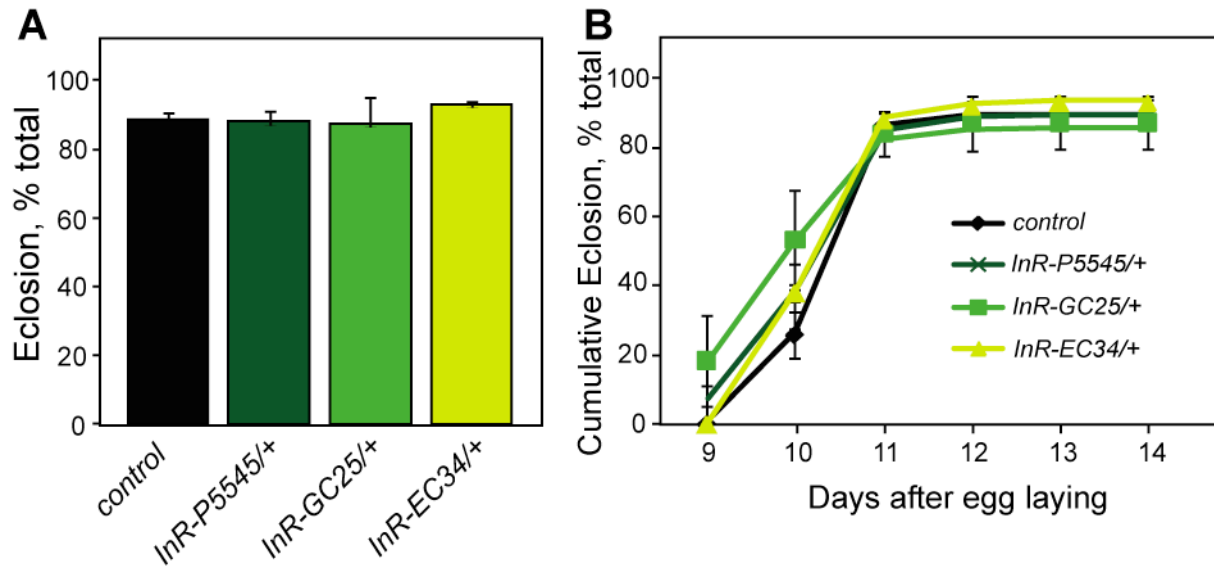

Figure S10

**Figure S10: Heterozygous insulin receptor mutants do not show altered adult viability/developmental time**

Total eclosion (**A**) and cumulative eclosion rates (**B**) of control (Dahomey) and heterozygous *InR* mutants (*InR<sup>P5545</sup>/+*, *InR<sup>GC25</sup>/+* and *InR<sup>EC34</sup>/+*, all in Dahomey background) are similar when reared on regular (0% ethanol) media.
