# Supplementary material for: A Drosophila model for fetal alcohol syndrome disorders: role for the insulin pathway
Source: PubMed Central journal article supplement — Dis Model Mech. 2011 Feb 8;4(3):335–46. doi: 10.1242/dmm.006411 (PMC3097455; doi:10.1242/dmm.006411), 2011-02-08
Supplement: supp_006411_DMM006411FigS11.pdf [file supp_006411_DMM006411FigS11.pdf]

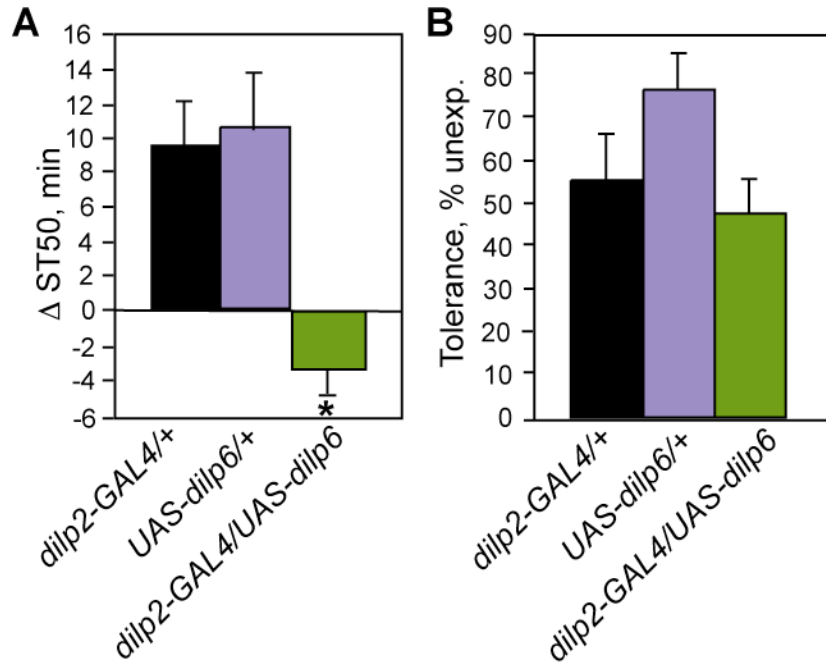

Figure S11

**Figure S11: *dilp6* expression rescues sedation resistance but not tolerance development.**

**A.** *dilp6* expression rescues ethanol-induced sedation resistance. Data are presented as difference in time to 50% sedation (ST<sub>50</sub>) between ethanol-reared and control flies of the same genotype. *dilp2-GAL4/UAS-dilp6* flies do not display increased sedation resistance upon ethanol-rearing, while both genetic background controls show the expected increase in ST<sub>50</sub>. (one way ANOVA with Tukey HSD post-hoc analysis, N= 12, \*p<0.05). **B.** *dilp6* expression fails to rescue ethanol-induced tolerance defects. Data are presented as the percent control tolerance (tolerance developed by ethanol-reared flies divided by tolerance developed by control flies of the same genotype multiplied by 100). *dilp2-GAL4/UAS-dilp6* flies are not significantly different from *dilp2-GAL4/+* controls (one way ANOVA, N = 6, \*p>0.05), with both showing the predicted 40-50% reduction in tolerance when reared on ethanol. *UAS-dilp6/+* controls were unexpectedly resistant to ethanol-induced tolerance defects.
