# Supplementary material for: A Drosophila model for fetal alcohol syndrome disorders: role for the insulin pathway
Source: PubMed Central journal article supplement — Dis Model Mech. 2011 Feb 8;4(3):335–46. doi: 10.1242/dmm.006411 (PMC3097455; doi:10.1242/dmm.006411), 2011-02-08
Supplement: supp_006411_DMM006411TableS1.pdf [file supp_006411_DMM006411TableS1.pdf]

Table S1. Volume of Ethanol-Reared Animals

| <u>Developmental Stage</u> | <u>0% ethanol (<math>\bar{x} \pm SD</math>)</u> | <u>5% ethanol (<math>\bar{x} \pm SD</math>)</u> |
|----------------------------|-------------------------------------------------|-------------------------------------------------|
| 1st instar larvae          | 0.22 $\pm$ 0.024                                | 0.24 $\pm$ 0.019                                |
| 2nd instar larvae          | 0.68 $\pm$ 0.092                                | 0.65 $\pm$ 0.093                                |
| Early 3rd instar larvae    | 0.94 $\pm$ 0.156                                | 0.89 $\pm$ 0.098                                |
| Wandering larvae           | 2.42 $\pm$ 0.069                                | 2.25 $\pm$ 0.063                                |
| Pupae                      | 2.52 $\pm$ 0.038                                | 2.38 $\pm$ 0.045                                |
| Adult                      | 1.19 $\pm$ 0.158                                | 1.08 $\pm$ 0.09                                 |

Data shown are volume of larvae, pupae, and adults reared on 0 and 5% ethanol food.
